# Supplementary material
Source: Springer Nature journal article supplement (https://www.springermedizin.de/resource/supplementary/13756_2011_9_MOESM2_ESM.pdf/9682220)
Supplement: MOESM2 [file 9682220]

# Oral Antibiotic Scripts by Major Class 1995-2010\*

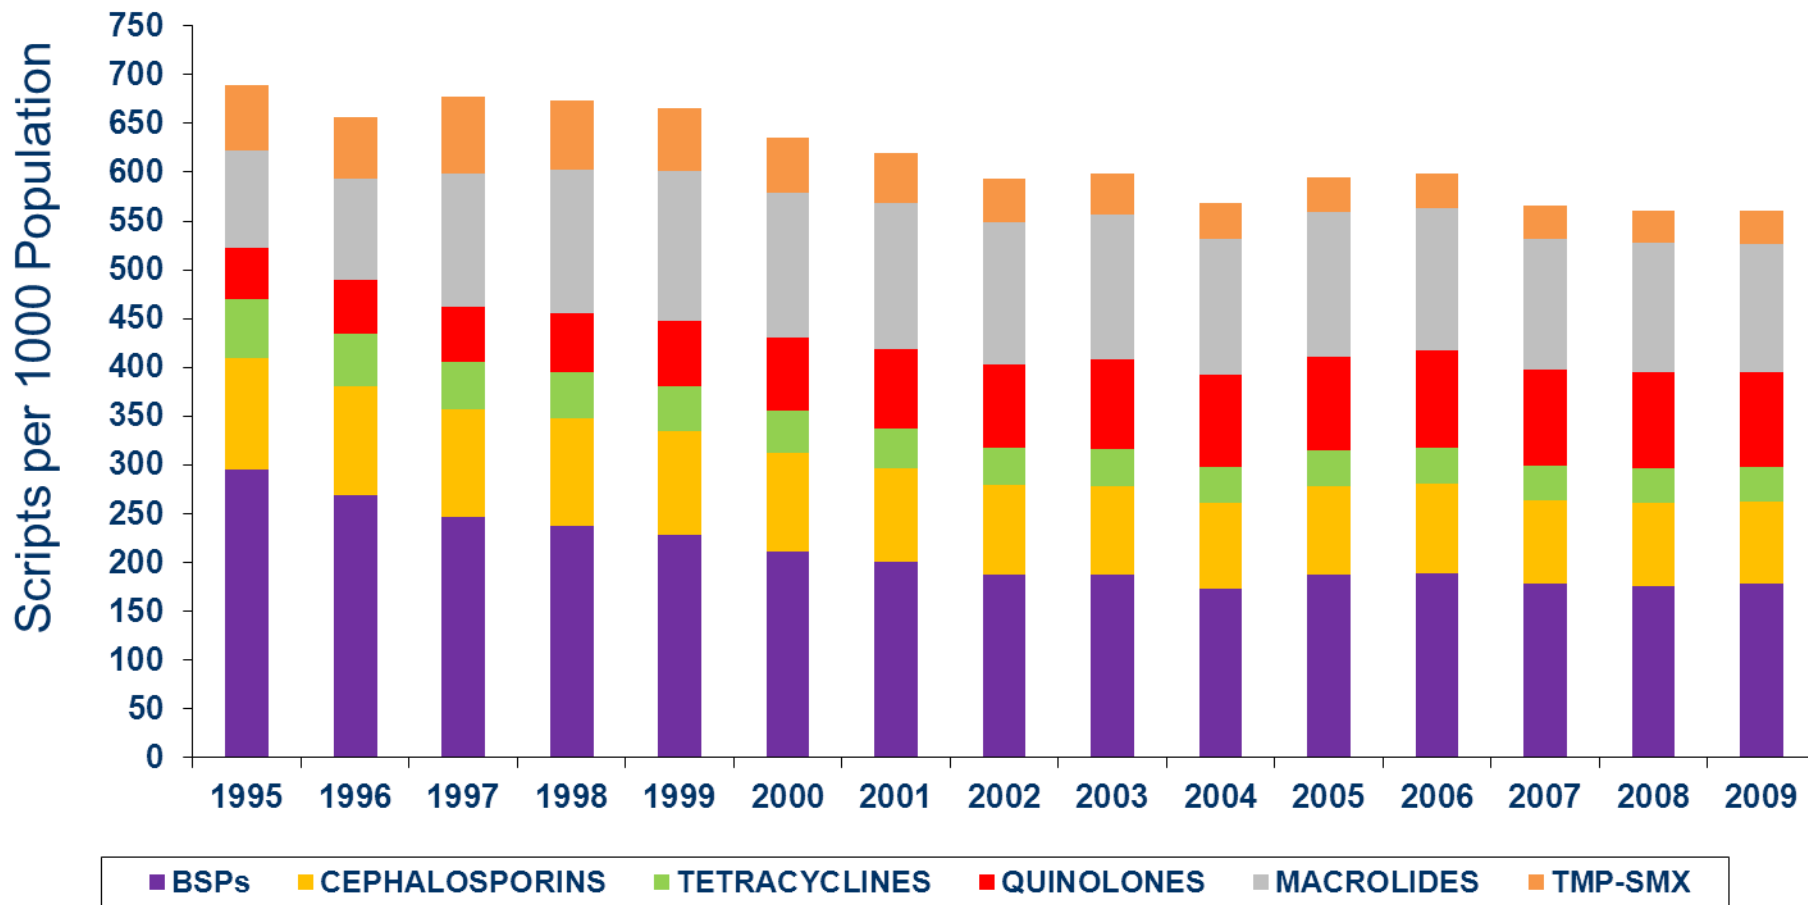

**BSP = Broad Spectrum Penicillins**  
**TMP-SMX = Trimethoprim-Sulfamethoxazole**

\*Data from IMS Health Canada provided to CCAR and CIPARS  
 Population data from Statistics Canada
